# Supplementary material for: Intracellular Ca2+-handling differs markedly between intact human muscle fibers and myotubes
Source: PubMed Central journal article supplement (PMC4545874; doi:10.1186/s13395-015-0050-x), 2015-08-20
Supplement: 13395_2015_50_MOESM1_ESM.pdf [file 13395_2015_50_MOESM1_ESM.pdf]

**Table S1.** Patient characteristics.

| <b>Patient #</b> | <b>Medications</b>                                                                                                               | <b>Comorbidities</b>                                            |
|------------------|----------------------------------------------------------------------------------------------------------------------------------|-----------------------------------------------------------------|
| <b>1</b>         | Enalapril, Amlodipine                                                                                                            | Hypertension, smoking                                           |
| <b>2</b>         | --                                                                                                                               | Prostate cancer                                                 |
| <b>3</b>         | Oxycodone, Paracetamol, Ethylmorphine,                                                                                           | --                                                              |
| <b>4</b>         | Furix, Metoprolol, Amlodipine, Oxycodone, Paracetamol,<br>Oxazepam                                                               | Hypertension                                                    |
| <b>5</b>         | Bisoprolol, Enalapril, Simvastatin, Trombyl                                                                                      | Atrial fibrillation, nephrosclerosis,<br>previous CABG, smoking |
| <b>6</b>         | Movicol, Trombyl, Metoprolol, Amlodipine, Losartan,<br>Nitrofurantoin, Oxycodone, Gabapentine, Ipratropium<br>bromide/salbutamol | Previous SAH, previous spinal infarction                        |

Abbreviations: CABG (coronary artery bypass graft), SAH (subarachnoid hemorrhage).
