# Supplementary material for: Intracellular Ca2+-handling differs markedly between intact human muscle fibers and myotubes
Source: PubMed Central journal article supplement (PMC4545874; doi:10.1186/s13395-015-0050-x), 2015-08-20

**A**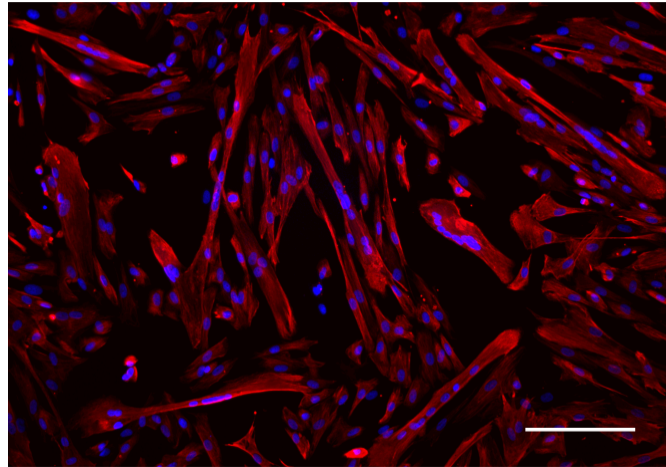**B**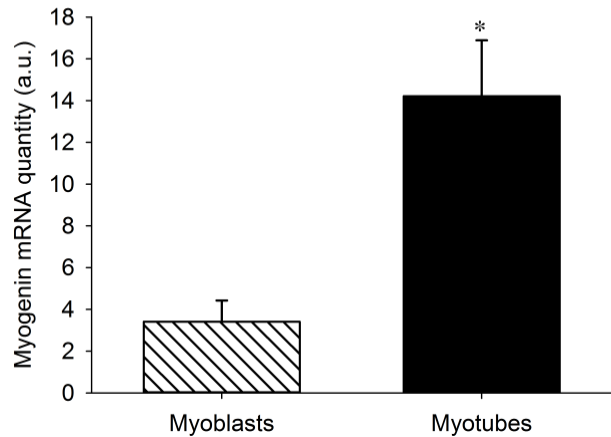

Supplement: 13395_2015_50_MOESM2_ESM.pdf [file 13395_2015_50_MOESM2_ESM.pdf]
